# Supplementary material for: Sub-10 nm BaLaF5:Mn/Yb/Er nanoprobes for dual-modal synergistic in vivo upconversion luminescence and X-ray bioimaging
Source: Royal Society of Chemistry journal article supplement (doi:10.1039/c4tb00675e), 2014-01-01
Supplement: c4tb00675e1.pdf [file c4tb00675e1.pdf]

SUPPORTING INFORMATION

**Sub-10 nm BaLaF<sub>5</sub>:Mn/Yb/Er nanoprobes for dual-modal synergistic *in vivo* upconversion luminescent and X-ray bioimaging**

**Ling Rao,<sup>a,b,d</sup> Wei Lu,<sup>c,d</sup> Tianmei Zeng,<sup>a</sup> Zhigao Yi,<sup>a,b</sup> Haibo Wang,<sup>a,b</sup> Hongrong Liu<sup>a</sup> and Songjun Zeng<sup>\*a</sup>**

*a* College of Physics and Information Science and Key Laboratory of Low-dimensional Quantum Structures and Quantum Control of the Ministry of Education, Hunan Normal University, Changsha, Hunan, People's Republic of China. Email: [songjunz@hunnu.edu.cn](mailto:songjunz@hunnu.edu.cn)

*b* Faculty of Materials, Optoelectronics and Physics, Key Laboratory of Low-dimensional Materials and Application Technology (Ministry of Education), Xiangtan University, Xiangtan 411105, People's Republic of China.

*c* Department of Applied Physics and Materials Research Center, The Hong Kong Polytechnic University, Hong Kong.

*d* These authors contributed equally to this study.

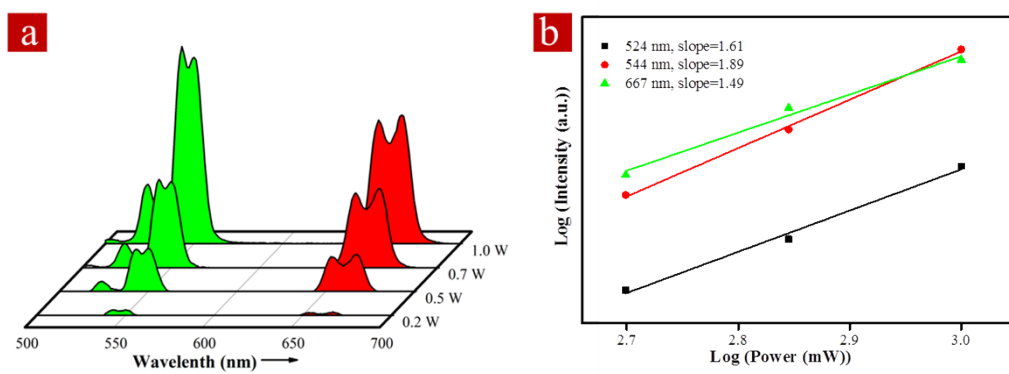

**Fig. S1** (a) Upconversion luminescence under different pump power, (b) The log-log plots of the UC luminescence intensity versus excitation power.

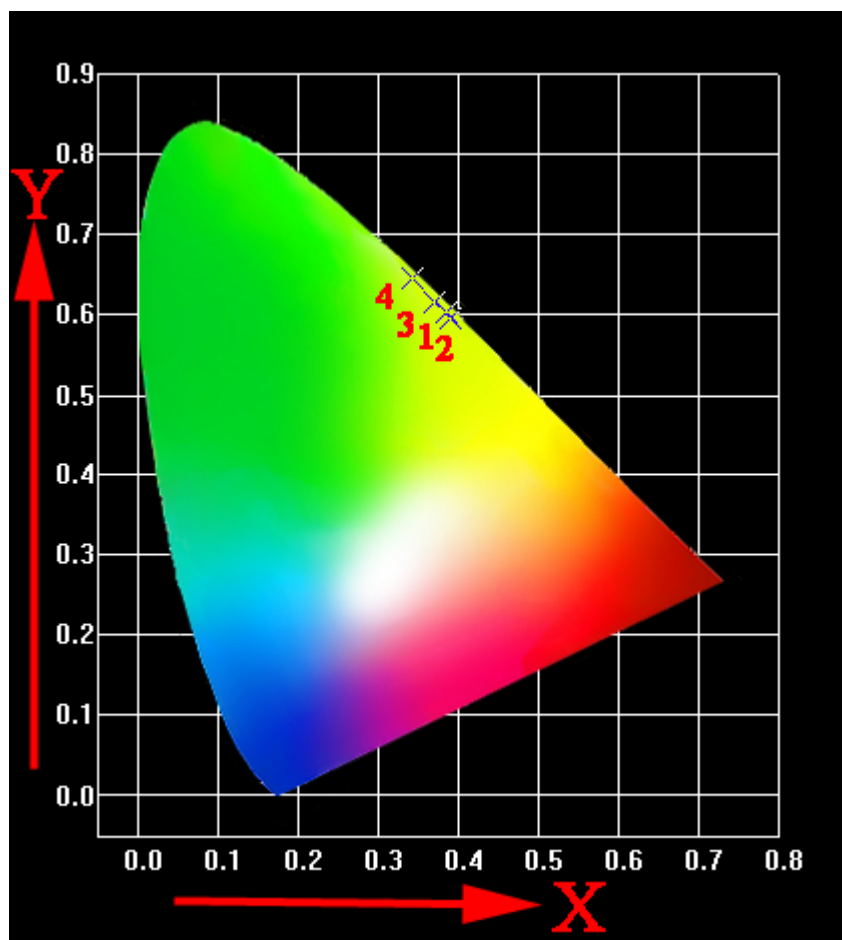

**Fig. S2** The coordinates of CIE chromaticity diagram of UCNPs doped with 0% (1: 0.386, 0.604), 5% (2: 0.391, 0.595), 10% (3: 0.370, 0.616) and 20% Mn (4: 0.342, 0.645).

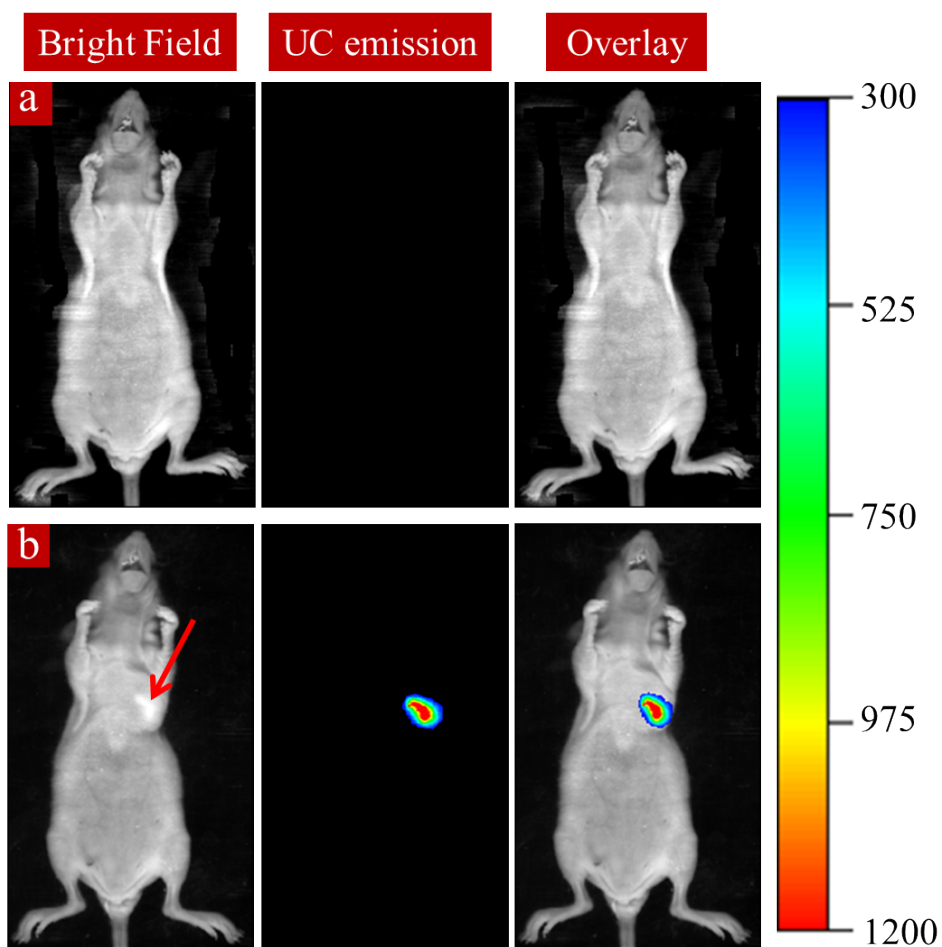

**Fig. S3** In vivo upconversion luminescent bioimaging of a nude mouse: (a) without subcutaneous injection of BaLaF<sub>5</sub>:20%Mn<sup>2+</sup> UCNPs, (b) with subcutaneous injection of the UCNPs.
